# Supplementary material for: Expression profiles of BrMYB transcription factors related to glucosinolate biosynthesis and stress response in eight subspecies of Brassica rapa
Source: PubMed Central journal article supplement (PMC5666390; doi:10.1002/2211-5463.12231), 2017-09-19
Supplement: FEB4-7-1646-s001.pdf [file FEB4-7-1646-s001.pdf]

**Table S1.** List of primers used for real-time PCR.

| Gene name         |   | Primer sequence                  |
|-------------------|---|----------------------------------|
| <i>BrMYB28.1</i>  | F | 5'-TTCCTGACAAATACTCTCGCC-3'      |
|                   | R | 5'-CCGAGATCAGAAGTAGCGTTG-3'      |
| <i>BrMYB28.2</i>  | F | 5'-GGTTTCAACACGGTTTTTCGAG-3'     |
|                   | R | 5'-AAGCCTTGATGTAGAACTTGATTTC-3'  |
| <i>BrMYB28.3</i>  | F | 5'-CCTGGGAACTTGCATTCTCTAG-3'     |
|                   | R | 5'-GAAAGAGGACGAGACATGGAAG-3'     |
| <i>BrMYB29.1</i>  | F | 5'-GAACCTTGATCCCCTCTACAAC-3'     |
|                   | R | 5'-ATTGCTCCAGAACTCCGAG-3'        |
| <i>BrMYB34.1</i>  | F | 5'-GGATCATGTTGGTCTTATGGAGG-3'    |
|                   | R | 5'-CTCCAAGTCCAGATCGTCATTC-3'     |
| <i>BrMYB34.2</i>  | F | 5'-ACCAAGAATTCGACCTCCAC-3'       |
|                   | R | 5'-AGAACAGTTGTCGGAGAAACC-3'      |
| <i>BrMYB34.3</i>  | F | 5'-GAACATTCAACGTCCACACTG-3'      |
|                   | R | 5'-GAAAGAACC GGGAGAAGTCG-3'      |
| <i>BrMYB34.4</i>  | F | 5'-TGCATTATGGAAGAGTTGAGGG-3'     |
|                   | R | 5'-AGAACCAAGAACTCCATCCC-3'       |
| <i>BrMYB51.1</i>  | F | 5'-ATTTGCAGGATATTCTGGAG-3'       |
|                   | R | 5'-GAACCTAGCCGACTTCTCCATCTT-3'   |
| <i>BrMYB51.2</i>  | F | 5'-TCTTTCACACCAACCTCAGATC-3'     |
|                   | R | 5'-ATCATTAAACGGATGCCTCAGAG-3'    |
| <i>BrMYB51.3</i>  | F | 5'-ACAGGGTGGCTAATAGGTTTG-3'      |
|                   | R | 5'-ACTTATCTGAAATAGAGTCAACGGTG-3' |
| <i>BrMYB122.1</i> | F | 5'-CTCTCCACACCAAACCTTCG-3'       |
|                   | R | 5'-TGAGCGGAGGTATCGTTAGAG-3'      |
| <i>BrMYB122.2</i> | F | 5'-ACAAATCACTTAATGGTAAATCA-3'    |
|                   | R | 5'-AGAACCGAGCTGATAATGATCC-3'     |
| <i>BrActin</i>    | F | 5'-GAACCGGGTGCTCCTCAGGA-3'       |
|                   | R | 5'-ATGGTACCGGAATGGTCAAGGC-3'     |

**Table S2.** Correlation analysis of relative expression level of *BrMYB* TFs related to GSL biosynthesis and GSL content in 19 accessions of *B. rapa* ssp. *pekinensis*.

| Gene              | PRO    | GRA    | SNG           | GAL    | GNL            | GNA    | GCC    | GBN           | Aliphatic GSLs | GBS            | 4-MOGBS | NGBS          | Indolic GSLs   | GNT           | Total GSLs |
|-------------------|--------|--------|---------------|--------|----------------|--------|--------|---------------|----------------|----------------|---------|---------------|----------------|---------------|------------|
| <i>BrMYB28.1</i>  | -0.183 | -0.185 | -0.163        | -0.092 | -0.229         | -0.108 | -0.080 | -0.149        | -0.149         | -0.146         | 0.106   | -0.283        | -0.150         | -0.111        | -0.178     |
| <i>BrMYB28.2</i>  | -0.186 | -0.208 | 0.221         | -0.377 | -0.234         | -0.131 | -0.103 | -0.087        | -0.164         | 0.139          | 0.251   | -0.331        | 0.038          | -0.053        | -0.147     |
| <i>BrMYB28.3</i>  | 0.214  | -0.208 | 0.433         | -0.027 | -0.111         | 0.352  | 0.294  | <b>0.530*</b> | 0.428          | -0.133         | -0.093  | -0.346        | -0.243         | <b>0.466*</b> | 0.392      |
| <i>BrMYB29.1</i>  | 0.154  | -0.074 | <b>0.495*</b> | -0.239 | -0.035         | -0.128 | -0.085 | -0.062        | -0.112         | 0.184          | 0.101   | -0.262        | 0.032          | 0.192         | -0.088     |
| <i>BrMYB34.1</i>  | -0.007 | 0.097  | 0.022         | -0.273 | -0.008         | -0.091 | -0.291 | 0.059         | -0.078         | 0.079          | 0.009   | -0.095        | 0.008          | -0.036        | -0.077     |
| <i>BrMYB34.2</i>  | -0.144 | -0.168 | -0.004        | -0.291 | -0.110         | -0.197 | -0.371 | -0.231        | -0.259         | -0.344         | -0.277  | -0.395        | -0.445         | -0.352        | -0.349     |
| <i>BrMYB34.3</i>  | -0.335 | -0.267 | -0.005        | -0.364 | -0.339         | -0.235 | -0.415 | -0.254        | -0.318         | -0.141         | -0.301  | -0.429        | -0.360         | -0.372        | -0.387     |
| <i>BrMYB34.4</i>  | -0.176 | -0.076 | -0.021        | -0.104 | -0.135         | -0.170 | -0.227 | -0.217        | -0.217         | -0.468         | -0.222  | -0.208        | -0.416         | -0.251        | -0.297     |
| <i>BrMYB51.1</i>  | -0.112 | 0.347  | -0.146        | 0.390  | -0.098         | -0.134 | -0.123 | -0.147        | -0.124         | <b>0.590**</b> | 0.370   | <b>0.488*</b> | <b>0.648**</b> | -0.001        | -0.005     |
| <i>BrMYB51.2</i>  | 0.403  | 0.058  | -0.101        | -0.155 | <b>0.619**</b> | 0.028  | -0.177 | 0.103         | 0.070          | -0.180         | -0.296  | 0.000         | -0.208         | 0.018         | 0.029      |
| <i>BrMYB51.3</i>  | -0.214 | -0.216 | -0.160        | -0.126 | -0.253         | -0.059 | -0.006 | -0.114        | -0.106         | -0.056         | 0.188   | -0.269        | -0.065         | -0.094        | -0.120     |
| <i>BrMYB122.1</i> | -0.248 | -0.181 | 0.304         | -0.238 | -0.159         | -0.191 | -0.236 | -0.263        | -0.260         | 0.113          | -0.020  | -0.346        | -0.085         | -0.149        | -0.266     |
| <i>BrMYB122.2</i> | -0.270 | -0.104 | <b>0.551*</b> | -0.248 | -0.318         | 0.048  | 0.052  | -0.014        | -0.011         | 0.288          | 0.079   | -0.099        | 0.144          | 0.120         | 0.034      |

\* and \*\* indicated a significant correlated at the level of  $P < 0.05$ ,  $P < 0.01$ , respectively and without any \* means not significant.

**Table S3.** Correlation analysis of relative expression level of *BrMYB* TFs related to GSL biosynthesis and GSL content in five accessions of *B. rapa* ssp. *chinensis*.

| Gene              | PRO            | GRA            | SNG           | GAL    | GNL            | GNA    | GCC    | GBN    | Aliphatic GSLs | GBS    | 4-MOGBS        | NGBS   | Indolic GSLs  | GNT           | Total GSLs    |
|-------------------|----------------|----------------|---------------|--------|----------------|--------|--------|--------|----------------|--------|----------------|--------|---------------|---------------|---------------|
| <i>BrMYB28.1</i>  | -0.414         | 0.552          | 0.079         | -0.480 | -0.514         | -0.298 | -0.311 | -0.751 | -0.731         | -0.531 | 0.826          | -0.353 | -0.271        | -0.542        | -0.688        |
| <i>BrMYB28.2</i>  | -0.111         | 0.433          | 0.429         | -0.690 | -0.129         | -0.345 | -0.377 | -0.923 | -0.788         | -0.870 | 0.470          | -0.705 | -0.833        | -0.940        | -0.856        |
| <i>BrMYB28.3</i>  | <b>0.928*</b>  | -0.805         | -0.434        | 0.648  | 0.815          | -0.789 | 0.373  | 0.405  | -0.353         | 0.277  | -0.056         | -0.680 | -0.137        | -0.231        | -0.346        |
| <i>BrMYB29.1</i>  | -0.128         | 0.402          | -0.384        | -0.187 | -0.249         | -0.572 | -0.366 | -0.431 | -0.800         | -0.305 | <b>0.977**</b> | -0.319 | -0.026        | -0.320        | -0.701        |
| <i>BrMYB34.1</i>  | -0.405         | 0.722          | -0.415        | -0.352 | -0.423         | -0.184 | -0.641 | -0.331 | -0.466         | -0.277 | <b>0.905*</b>  | 0.205  | 0.222         | 0.069         | -0.356        |
| <i>BrMYB34.2</i>  | -0.478         | 0.767          | -0.237        | -0.426 | -0.337         | 0.361  | -0.732 | -0.057 | 0.156          | -0.171 | 0.335          | 0.713  | 0.337         | 0.474         | 0.211         |
| <i>BrMYB34.3</i>  | -0.314         | 0.679          | -0.445        | -0.338 | -0.344         | -0.301 | -0.646 | -0.355 | -0.570         | -0.315 | <b>0.949*</b>  | 0.085  | 0.151         | -0.020        | -0.463        |
| <i>BrMYB34.4</i>  | -0.622         | <b>0.968**</b> | -0.004        | -0.723 | -0.509         | 0.260  | -0.828 | -0.490 | -0.167         | -0.520 | 0.557          | 0.430  | 0.015         | 0.069         | -0.136        |
| <i>BrMYB51.1</i>  | -0.370         | -0.193         | -0.192        | 0.514  | -0.399         | 0.586  | 0.471  | 0.655  | 0.807          | 0.823  | -0.320         | 0.824  | <b>0.910*</b> | <b>0.902*</b> | <b>0.893*</b> |
| <i>BrMYB51.2</i>  | -0.172         | 0.435          | -0.363        | -0.213 | -0.289         | -0.535 | -0.377 | -0.448 | -0.782         | -0.314 | <b>0.978**</b> | -0.288 | -0.017        | -0.309        | -0.684        |
| <i>BrMYB51.3</i>  | <b>0.973**</b> | -0.545         | -0.593        | 0.465  | <b>0.978**</b> | -0.711 | -0.071 | 0.478  | -0.273         | 0.143  | -0.047         | -0.425 | -0.112        | -0.037        | -0.272        |
| <i>BrMYB122.1</i> | -0.498         | 0.789          | -0.152        | -0.485 | -0.341         | 0.414  | -0.744 | -0.099 | 0.185          | -0.222 | 0.275          | 0.711  | 0.275         | 0.439         | 0.223         |
| <i>BrMYB122.2</i> | -0.305         | 0.273          | <b>0.888*</b> | -0.674 | -0.281         | 0.172  | -0.026 | -0.834 | -0.262         | -0.714 | -0.118         | -0.483 | -0.824        | -0.815        | -0.392        |

\* and \*\* indicated a significant correlated at the level of  $P < 0.05$ ,  $P < 0.01$ , respectively and without any \* means not significant.

**Table S4.** Correlation analysis of relative expression level of *BrMYB* TFs related to GSL biosynthesis and GSLs content in six accessions of *B. rapa* ssp. *rapa*.

| Gene              | PRO    | GRA    | SNG    | GAL           | GNL           | GNA    | GCC            | GBN            | Aliphatic GSLs | GBS    | 4-MOGBS | NGBS          | Indolic GSLs | GNT    | Total GSLs |
|-------------------|--------|--------|--------|---------------|---------------|--------|----------------|----------------|----------------|--------|---------|---------------|--------------|--------|------------|
| <i>BrMYB28.1</i>  | 0.428  | -0.141 | -0.064 | -0.102        | -0.137        | 0.612  | 0.310          | -0.184         | 0.664          | -0.513 | 0.165   | -0.763        | -0.701       | -0.367 | 0.633      |
| <i>BrMYB28.2</i>  | 0.514  | -0.103 | -0.726 | -0.670        | 0.600         | -0.337 | 0.765          | -0.236         | -0.153         | 0.108  | 0.114   | -0.523        | -0.066       | -0.924 | -0.168     |
| <i>BrMYB28.3</i>  | -0.243 | -0.444 | -0.782 | -0.520        | <b>0.876*</b> | -0.893 | 0.564          | 0.289          | -0.630         | 0.506  | -0.066  | 0.316         | 0.555        | -0.310 | -0.614     |
| <i>BrMYB29.1</i>  | 0.657  | 0.481  | 0.462  | 0.505         | -0.285        | 0.466  | -0.476         | 0.218          | 0.431          | 0.424  | -0.518  | 0.568         | 0.465        | 0.251  | 0.456      |
| <i>BrMYB34.1</i>  | 0.133  | -0.287 | -0.909 | -0.412        | 0.627         | -0.404 | <b>0.990**</b> | -0.239         | -0.155         | -0.231 | 0.452   | -0.540        | -0.296       | -0.866 | -0.180     |
| <i>BrMYB34.2</i>  | -0.010 | -0.467 | -0.706 | -0.425        | 0.431         | -0.123 | <b>0.844*</b>  | -0.183         | 0.082          | -0.455 | 0.449   | -0.740        | -0.572       | -0.655 | 0.050      |
| <i>BrMYB34.3</i>  | -0.119 | -0.731 | 0.015  | -0.338        | 0.434         | -0.027 | -0.238         | <b>0.954**</b> | 0.188          | 0.697  | -0.821  | 0.618         | 0.657        | 0.570  | 0.224      |
| <i>BrMYB34.4</i>  | -0.122 | 0.024  | 0.244  | <b>0.837*</b> | -0.320        | 0.457  | -0.165         | 0.232          | 0.498          | -0.275 | 0.064   | 0.375         | -0.096       | 0.453  | 0.502      |
| <i>BrMYB51.1</i>  | -0.730 | 0.435  | 0.235  | 0.228         | -0.453        | -0.369 | -0.217         | -0.656         | -0.685         | -0.496 | 0.688   | -0.187        | -0.350       | 0.110  | -0.701     |
| <i>BrMYB51.2</i>  | -0.403 | -0.035 | 0.325  | 0.549         | -0.119        | -0.032 | -0.481         | 0.486          | -0.032         | 0.298  | -0.287  | <b>0.873*</b> | 0.519        | 0.752  | 0.000      |
| <i>BrMYB51.3</i>  | 0.216  | -0.208 | -0.812 | -0.439        | 0.508         | -0.283 | <b>0.935**</b> | -0.345         | -0.087         | -0.315 | 0.475   | -0.694        | -0.422       | -0.904 | -0.117     |
| <i>BrMYB122.1</i> | -0.133 | -0.561 | 0.300  | -0.413        | -0.109        | 0.429  | -0.281         | 0.354          | 0.420          | -0.063 | -0.350  | -0.304        | -0.252       | 0.382  | 0.416      |
| <i>BrMYB122.2</i> | -0.302 | -0.128 | 0.310  | 0.757         | -0.331        | 0.450  | -0.258         | 0.331          | 0.479          | -0.275 | 0.013   | 0.384         | -0.105       | 0.615  | 0.485      |

\* and \*\* indicated a significant correlated at the level of  $P < 0.05$ ,  $P < 0.01$ , respectively and without any \* means not significant.
